# Supplementary material for: Dual hydrogen-bond donor group-containing Zn-MOF for the highly effective coupling of CO2and epoxides under mild and solvent-free conditions
Source: Royal Society of Chemistry journal article supplement (doi:10.1039/d0qi00068j), 2020-01-01
Supplement: d0qi00068j1.pdf [file d0qi00068j1.pdf]

## Supporting Information

### Dual hydrogen-bond donor groups-containing Zn-MOF for the highly effective coupling of CO<sub>2</sub> and epoxides under mild and solvent-free conditions

Ziyu Gao, Xiao Zhang, Ping Xu, Jianmin Sun\*

State Key Laboratory of Urban Water Resource and Environment, MIIT Key Laboratory of Critical Materials Technology for New Energy Conversion and Storage, School of Chemistry and Chemical Engineering, Harbin Institute of Technology, Harbin 150080, China

Corresponding author: sunjm@hit.edu.cn (Jianmin Sun)

### Table of Contents

|                                                                                                                                                                                        |    |
|----------------------------------------------------------------------------------------------------------------------------------------------------------------------------------------|----|
| <b>Table S1</b> Crystal data and structure refinement                                                                                                                                  | S2 |
| <b>Table S2</b> The selected bond lengths and angles                                                                                                                                   | S2 |
| <b>Fig. S1</b> Calibration curve of PC yield based on GC results                                                                                                                       | S3 |
| <b>Fig. S2</b> N <sub>2</sub> adsorption–desorption isotherm of Zn <sub>3</sub> (L) <sub>3</sub> (H <sub>2</sub> L) and the pore size distribution calculated from desorption isotherm | S3 |

## X-ray Crystallography

**Table S1** Crystal data and structure refinement for Zn<sub>3</sub>(L)<sub>3</sub>(H<sub>2</sub>L)

|                                                     |                                                                                |
|-----------------------------------------------------|--------------------------------------------------------------------------------|
| Empirical formula                                   | C <sub>32</sub> H <sub>20</sub> N <sub>4</sub> O <sub>16</sub> Zn <sub>3</sub> |
| Formula weight                                      | 912.63                                                                         |
| Temperature/K                                       | 302.93                                                                         |
| Crystal system                                      | monoclinic                                                                     |
| Space group                                         | <i>C2/c</i>                                                                    |
| <i>a</i> /Å                                         | 33.5352(13)                                                                    |
| <i>b</i> /Å                                         | 9.8226(4)                                                                      |
| <i>c</i> /Å                                         | 18.0794(7)                                                                     |
| Volume/Å <sup>3</sup>                               | 5949.1(4)                                                                      |
| <i>Z</i>                                            | 4                                                                              |
| $\rho$ calcg/cm <sup>3</sup>                        | 1.019                                                                          |
| $\mu$ /mm <sup>-1</sup>                             | 1.248                                                                          |
| <i>F</i> (000)                                      | 1832.0                                                                         |
| Reflections collected                               | 43220                                                                          |
| Independent reflections                             | 5401 [ <i>R</i> <sub>int</sub> = 0.0611, <i>R</i> <sub>sigma</sub> = 0.0341]   |
| Data/restraints/parameters                          | 5401/0/272                                                                     |
| Goodness-of-fit on <i>F</i> <sup>2</sup>            | 1.118                                                                          |
| Final <i>R</i> indexes [ <i>I</i> ≥ 2σ( <i>I</i> )] | <i>R</i> <sub>1</sub> = 0.0404, w <i>R</i> <sub>2</sub> = 0.1340               |
| Final <i>R</i> indexes [all data]                   | <i>R</i> <sub>1</sub> = 0.0537, w <i>R</i> <sub>2</sub> = 0.1414               |

**Table S2** The selected bond lengths (Å) and angles (deg) of Zn<sub>3</sub>(L)<sub>3</sub>(H<sub>2</sub>L)

|                                           |           |                                            |            |
|-------------------------------------------|-----------|--------------------------------------------|------------|
| Zn1- O1                                   | 1.956(3)  | O1- Zn1- O3 <sup>i</sup>                   | 108.58(14) |
| Zn1- O3 <sup>i</sup>                      | 1.978(3)  | O1- Zn1- O8                                | 111.53(11) |
| Zn1- O5                                   | 1.941(3)  | O3 <sup>i</sup> - Zn1- O8                  | 97.01(12)  |
| Zn1- O8                                   | 2.016(3)  | O5- Zn1- O1                                | 98.55(16)  |
| Zn2- O2 <sup>ii</sup>                     | 2.048(3)  | O5- Zn1- O3 <sup>i</sup>                   | 103.75(14) |
| Zn2- O2 <sup>iii</sup>                    | 2.048(3)  | O5- Zn1- O8                                | 135.48(16) |
| Zn2- O4                                   | 2.033(2)  | O2 <sup>ii</sup> - Zn2- O2 <sup>iii</sup>  | 180.0      |
| Zn2- O4 <sup>iv</sup>                     | 2.033(2)  | O2 <sup>iii</sup> - Zn2- O8 <sup>iii</sup> | 90.17(10)  |
| Zn2- O8 <sup>iii</sup>                    | 2.263(2)  | O2 <sup>iii</sup> - Zn2- O8 <sup>ii</sup>  | 89.83(10)  |
| Zn2- O8 <sup>ii</sup>                     | 2.263(2)  | O4- Zn2- O2 <sup>iii</sup>                 | 93.88(11)  |
|                                           |           | O4- Zn2- O2 <sup>ii</sup>                  | 86.12(11)  |
|                                           |           | O4 <sup>iv</sup> - Zn2- O2 <sup>ii</sup>   | 93.88(11)  |
|                                           |           | O4 <sup>iv</sup> - Zn2- O2 <sup>iii</sup>  | 86.12(11)  |
| O4 <sup>iv</sup> - Zn2- O8 <sup>ii</sup>  | 89.36(10) | O4 <sup>iv</sup> - Zn2- O4                 | 180.0      |
| O4- Zn2- O8 <sup>ii</sup>                 | 90.64(10) | O4 <sup>iv</sup> - Zn2- O8 <sup>iii</sup>  | 90.64(10)  |
| O8 <sup>iii</sup> - Zn2- O8 <sup>ii</sup> | 180.0     | O4- Zn2- O8 <sup>iii</sup>                 | 89.36(10)  |

Symmetry codes: (i) *x*, -*y*, -0.5+*z*; (ii) 0.5-*x*, -0.5+*y*, 1.5-*z*; (iii) *x*, -*y*, 0.5+*z*; (iv) 0.5-*x*, -0.5-*y*, 2-*z*

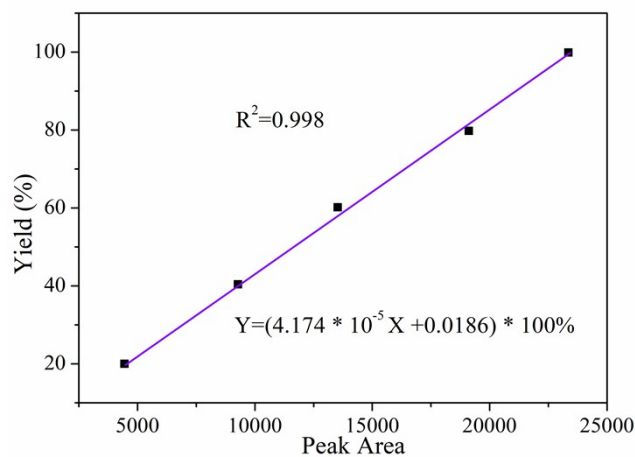

**Fig. S1** Calibration curve of PC yield based on GC results

In the GC chromatograms of product PC, the special retention time of PC is 2.8-3.2 min. So the yield could be calculated by the calibration curve of PC yield (Fig. S1) with the peak area in the range of time.

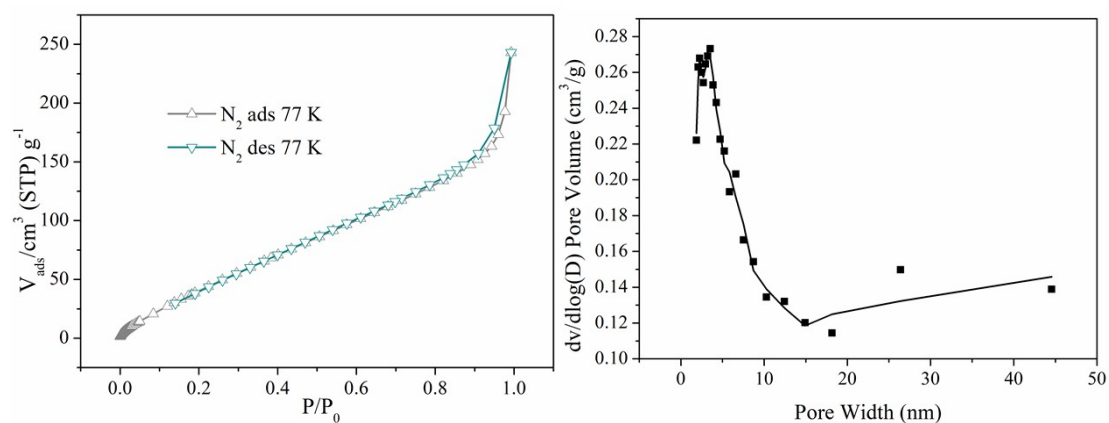

**Fig. S2**  $N_2$  adsorption–desorption isotherm of  $Zn_3(L)_3(H_2L)$  and the pore size distribution calculated from desorption isotherm
